# Supplementary material for: A randomized controlled trial of 5 daily sessions and continuous trial of 4 weekly sessions of repetitive transcranial magnetic stimulation for neuropathic pain
Source: PubMed Central journal article supplement — Pain. 2019 Oct 7;161(2):351–60. doi: 10.1097/j.pain.0000000000001712 (PMC6970577; doi:10.1097/j.pain.0000000000001712), 2019-10-07
Supplement: jop-161-351-s001.pdf [file jop-161-351-s001.pdf]

## Supplementary Figure 1. Details of the trial schedule

| Item                                          | Clinical trial period           |         |                   |         |         |                     |                | Clinical trial period (continuous trial) |          |          |          | Follow-up period                         |
|-----------------------------------------------|---------------------------------|---------|-------------------|---------|---------|---------------------|----------------|------------------------------------------|----------|----------|----------|------------------------------------------|
|                                               | Pre-evaluation period           |         | Evaluation period |         |         |                     |                | Continuous-evaluation period             |          |          |          |                                          |
|                                               | 2 weeks before intervention     | 1st day | 2nd day           | 3rd day | 4th day | 5th day or abortion |                | 1st week                                 | 2nd week | 3rd week | 4th week | 4 weeks after completion of intervention |
| Informed consent                              | +                               |         |                   |         |         |                     |                |                                          |          |          |          |                                          |
| Eligibility evaluation (VAS, MMSE, BDI-II)    | +                               |         |                   |         |         |                     |                |                                          |          |          |          |                                          |
| Final eligibility test (Compliance test)      |                                 | +       |                   |         |         |                     |                |                                          |          |          |          |                                          |
| Definitive registration and assignment        |                                 | +       |                   |         |         |                     |                |                                          |          |          |          |                                          |
| Eligibility evaluation for continuous trial   |                                 |         |                   |         |         |                     | +              |                                          |          |          |          |                                          |
| Informed consent for continuous trial         |                                 |         |                   |         |         |                     | +              |                                          |          |          |          |                                          |
| Intervention                                  | Active or sham stimulation      |         | +                 | +       | +       | +                   | +              |                                          |          |          |          |                                          |
|                                               | Active stimulation              |         |                   |         |         |                     |                |                                          | +        | +        | +        | +                                        |
| VAS                                           | Immediately before intervention |         | +                 | +       | +       | +                   | +              |                                          | +        | +        | +        | +                                        |
|                                               | Immediately after intervention  |         | +                 | +       | +       | +                   | +              |                                          | +        | +        | +        | +                                        |
| SF-MPQ2                                       | Immediately before intervention |         | +                 | +       | +       | +                   | +              |                                          | +        | +        | +        | +                                        |
|                                               | Immediately after intervention  |         | +                 | +       | +       | +                   | +              |                                          | +        | +        | +        | +                                        |
| PGIC <sup>a</sup>                             | After intervention              |         |                   |         |         |                     | +              |                                          |          |          |          | + <sup>b</sup>                           |
| BDI-II <sup>a</sup> , EQ-5D-5L <sup>a</sup>   |                                 |         | + <sup>c</sup>    |         |         |                     | + <sup>d</sup> |                                          |          |          |          | + <sup>e</sup>                           |
| Final evaluation (VAS, SF-MPQ2, MMSE, BDI-II) |                                 |         |                   |         |         |                     |                |                                          |          |          |          | +                                        |
| Adverse events and malfunction of devices     |                                 |         | +                 | +       | +       | +                   | +              |                                          | +        | +        | +        | +                                        |
| Evaluation of blindness <sup>a</sup>          | After intervention              |         | +                 |         |         |                     | +              |                                          |          |          |          |                                          |

The schedule of evaluations is shown. Evaluations during the continuous trial were performed on the day of the intervention (at least once weekly).

Abbreviations: VAS, visual analogue scale; MMSE, Mini mental state examination; BDI-II, Beck Depression Inventory second version; SF-MPQ2, short-form McGill pain questionnaire 2; PGIC, Patient Global Impression of Change; EQ-5D-5L, European Quality of Life-5 Dimensions 5-level.

<sup>a</sup> Performed on the day of treatment termination or the day after treatment termination in cases of study withdrawal.

<sup>b</sup> Evaluated on the final day of intervention.      <sup>c</sup> Evaluated before the intervention.

<sup>d</sup> Evaluated after the intervention.      <sup>e</sup> Evaluated after the final intervention.
