# Supplementary material for: A randomized controlled trial of 5 daily sessions and continuous trial of 4 weekly sessions of repetitive transcranial magnetic stimulation for neuropathic pain
Source: PubMed Central journal article supplement — Pain. 2019 Oct 7;161(2):351–60. doi: 10.1097/j.pain.0000000000001712 (PMC6970577; doi:10.1097/j.pain.0000000000001712), 2019-10-07
Supplement: jop-161-351-s002.pdf [file jop-161-351-s002.pdf]

**Supplementary Table 1. Evaluation of blinding**

|                                   | <b>Active</b> | <b>Sham</b> |
|-----------------------------------|---------------|-------------|
| <b>First day, No. (%)</b>         | <b>n=72</b>   | <b>n=70</b> |
| Thought that they received active | 21 (29)       | 20 (29)     |
| Thought that they received sham   | 11 (15)       | 11 (16)     |
| Cannot tell                       | 40 (56)       | 39 (56)     |
| <b>Fifth day, No. (%)</b>         | <b>n=71</b>   | <b>n=68</b> |
| Thought that they received active | 22 (31)       | 27 (40)     |
| Thought that they received sham   | 13 (18)       | 14 (21)     |
| Cannot tell                       | 36 (51)       | 27 (40)     |

Among the active stimulation group, 21 patients (29%) correctly guessed their intervention on the first day and 22 (31%) on the fifth day. Among the sham group, 11 patients (16%) guessed correctly on the first day and 14 (21%) on the fifth day.
