# Supplementary material for: A randomized controlled trial of 5 daily sessions and continuous trial of 4 weekly sessions of repetitive transcranial magnetic stimulation for neuropathic pain
Source: PubMed Central journal article supplement — Pain. 2019 Oct 7;161(2):351–60. doi: 10.1097/j.pain.0000000000001712 (PMC6970577; doi:10.1097/j.pain.0000000000001712), 2019-10-07
Supplement: jop-161-351-s003.pdf [file jop-161-351-s003.pdf]

**Supplementary Table 2. Secondary outcomes of five daily interventions (change rate)**

|                                        | <b>Active<br/>n=72</b> | <b>Sham<br/>n=70</b> | <b>Mean difference or<br/>odds ratio (95% CI)</b> | <b>p value</b> |
|----------------------------------------|------------------------|----------------------|---------------------------------------------------|----------------|
| VAS                                    |                        |                      |                                                   |                |
| Decrease rate, mean (SD), %            | 12.1 (19.0)            | 13.5 (19.4)          | -1.4 (-7.8 to 4.9)                                | 0.66           |
| ≥15% decrease, No. (%)                 | 26 (36)                | 28 (40)              | 0.8 (0.4 to 1.7)                                  | 0.73           |
| ≥30% decrease, No. (%)                 | 10 (14)                | 12 (17)              | 0.8 (0.3 to 1.9)                                  | 0.65           |
| Short-term decrease rate, mean (SD), % | 6.3 (11.9)             | 6.0 (15.2)           | 0.3 (-4.2 to 4.8)                                 | 0.89           |
| SF-MPQ2, mean (SD), %                  |                        |                      |                                                   |                |
| Decrease rate                          | 33.4 (30.3)            | 29.1 (28.8)          | 4.3 (-5.5 to 14.1)                                | 0.39           |
| Short-term decrease rate               | 14.2 (16.4)            | 14.1 (15.9)          | 0.1 (-5.2 to 5.4)                                 | 0.98           |
| EQ-5D-5L, mean (SD), %                 |                        |                      |                                                   |                |
| Index value rate of increase           | 14.7 (45.1)            | 10.6 (27.2)          | 4.0 (-8.5 to 16.6)                                | 0.52           |
| VAS <sub>EQ-5D</sub> rate of increase  | 8.0 (37.7)             | 7.3 (55.3)           | 0.7 (-15.1 to 16.5)                               | 0.93           |
| BDI-II, mean (SD), %                   |                        |                      |                                                   |                |
| Decrease rate <sup>a</sup>             | -1.1 (63.9)            | 8.6 (120.4)          | 7.5 (-27.9 to 42.8)                               | 0.67           |

Analyses were performed on the intention-to-treat population (active vs. sham, n=72 vs. 70), except for analysis on decrease rate of BDI-II.

Abbreviations: VAS, visual analogue scale; SF-MPQ2, short-form McGill pain questionnaire 2; EQ-5D-5L, European Quality of Life-5 Dimensions 5-level; BDI-II, Beck Depression Inventory second version.

<sup>a</sup> Analysis was performed in 57 (active) and 64 (sham) patients because excluded patients had a score of zero at baseline.
