# Supplementary material for: A randomized controlled trial of 5 daily sessions and continuous trial of 4 weekly sessions of repetitive transcranial magnetic stimulation for neuropathic pain
Source: PubMed Central journal article supplement — Pain. 2019 Oct 7;161(2):351–60. doi: 10.1097/j.pain.0000000000001712 (PMC6970577; doi:10.1097/j.pain.0000000000001712), 2019-10-07
Supplement: jop-161-351-s004.pdf [file jop-161-351-s004.pdf]

**Supplementary Table 3. Results of the final evaluations at the last follow-up**

|                                                    | All patients   |              |                             |         | Patients enrolled in the continuous trial |              |                             |         |
|----------------------------------------------------|----------------|--------------|-----------------------------|---------|-------------------------------------------|--------------|-----------------------------|---------|
|                                                    | Active<br>n=70 | Sham<br>n=67 | Mean difference<br>(95% CI) | p value | Active<br>n=16                            | Sham<br>n=15 | Mean difference<br>(95% CI) | p value |
| VAS decrease, mean (SD)                            | 6.9±18.4       | 7.3±13.6     | -0.4<br>(-6.7 to 5.8)       | 0.90    | 24.7±22.6                                 | 21.4±23.5    | 3.3<br>(-13.6 to 20.2)      | 0.69    |
| VAS decrease rate, mean (SD), %                    | 10.8±29.6      | 10.3±31.2    | 0.5<br>(-9.7 to 10.8)       | 0.92    | 40.9±36.8                                 | 32.5±36.3    | 8.4<br>(-18.4 to 35.3)      | 0.53    |
| SF-MPQ2 decrease, mean (SD)                        | 13.1±32.9      | 8.0±30.4     | 5.1<br>(-5.6 to 15.8)       | 0.35    | 37.6±31.5                                 | 15.1±33.8    | 22.5<br>(-1.5 to 46.5)      | 0.07    |
| SF-MPQ2 decrease rate, mean<br>(SD), %             | 20.5±48.2      | 13.6±46.7    | 6.8<br>(-9.2 to 22.9)       | 0.40    | 57.4±43.8                                 | 30.0±58.6    | 31.4<br>(-6.4 to 69.3)      | 0.10    |
| BDI-II decrease, mean (SD) <sup>a</sup>            | 0.4±5.3        | 0.9±5.9      | -0.6<br>(-2.4 to 1.3)       | 0.56    | 1.1±5.1                                   | 0.9±4.6      | -0.2<br>(-3.4 to 3.8)       | 0.91    |
| BDI-II decrease rate, mean<br>(SD), % <sup>b</sup> | 1.5±86.9       | -0.2±113.1   | 1.6<br>(-35.4 to 38.7)      | 0.93    | 15.9±73.8                                 | -10.7±169.9  | 26.7<br>(-76.6 to 129.9)    | 0.60    |
| MMSE increase, mean (SD)                           | 0.1±1.7        | 0.1±1.8      | -0.1<br>(-0.7 to 0.5)       | 0.80    | -0.4±1.8                                  | 0.1±1.6      | -0.6<br>(-1.8 to 0.7)       | 0.36    |
| MMSE increase rate, mean<br>(SD), %                | 0.3±6.0        | 0.6±6.6      | -0.3<br>(-2.5 to 1.8)       | 0.78    | -1.4±6.1                                  | 0.6±5.6      | -2.0<br>(-6.3 to 2.3)       | 0.36    |

Abbreviations: VAS, visual analogue scale; SF-MPQ2, short-form McGill pain questionnaire 2; BDI-II, Beck Depression Inventory second version; MMSE, Mini mental state examination.

<sup>a</sup> Analysis was performed in 69 (active) and 67 (sham) patients for the all patients.

<sup>b</sup> Analysis was performed in 56 (active) and 62 (sham) patients for the all patients, and in 14 (active) and 12 (sham) patients for the patients enrolled in the continuous trial.
