# Supplementary material for: A randomized controlled trial of 5 daily sessions and continuous trial of 4 weekly sessions of repetitive transcranial magnetic stimulation for neuropathic pain
Source: PubMed Central journal article supplement — Pain. 2019 Oct 7;161(2):351–60. doi: 10.1097/j.pain.0000000000001712 (PMC6970577; doi:10.1097/j.pain.0000000000001712), 2019-10-07
Supplement: jop-161-351-s005.pdf [file jop-161-351-s005.pdf]

**Supplementary Table 4. Post-hoc analyses of SF-MPQ2 during 5-daily intervention**

|                                                          | <b>Active</b> | <b>Sham</b> | <b>Mean difference (95% CI)</b> | <b>p value</b> |
|----------------------------------------------------------|---------------|-------------|---------------------------------|----------------|
| SF-MPQ2 Decrease (per-protocol)                          | 22.3 (24.3)   | 15.3 (19.8) | 7.0 (-0.6 to 14.6)              | 0.07           |
| Decrease of SF-MPQ2 subscale scores (intention-to-treat) |               |             |                                 |                |
| Continuous pain                                          | 7.9 (8.7)     | 4.8 (6.4)   | 3.1 (0.5 to 5.6)                | 0.02           |
| Intermittent pain                                        | 5.1 (8.8)     | 3.9 (7.6)   | 1.2 (-1.6 to 3.9)               | 0.41           |
| Neuropathic pain                                         | 5.0 (6.8)     | 4.0 (5.8)   | 1.0 (-1.1 to 3.1)               | 0.34           |
| Affective descriptors                                    | 3.7 (5.2)     | 3.5 (5.1)   | 0.2 (-1.5 to 1.9)               | 0.81           |

Data are mean (SD). Analyses were performed in the per-protocol population (active vs. sham, n=72 vs. 70) or the intention-to-treat population (n=69 vs. 65). SF-MPQ2 = short-form McGill pain questionnaire 2.
