# Supplementary material for: A randomized controlled trial of 5 daily sessions and continuous trial of 4 weekly sessions of repetitive transcranial magnetic stimulation for neuropathic pain
Source: PubMed Central journal article supplement — Pain. 2019 Oct 7;161(2):351–60. doi: 10.1097/j.pain.0000000000001712 (PMC6970577; doi:10.1097/j.pain.0000000000001712), 2019-10-07
Supplement: jop-161-351-s006.pdf [file jop-161-351-s006.pdf]

## Supplementary Figure 2A. Subgroup analyses of VAS decrease during the evaluation period

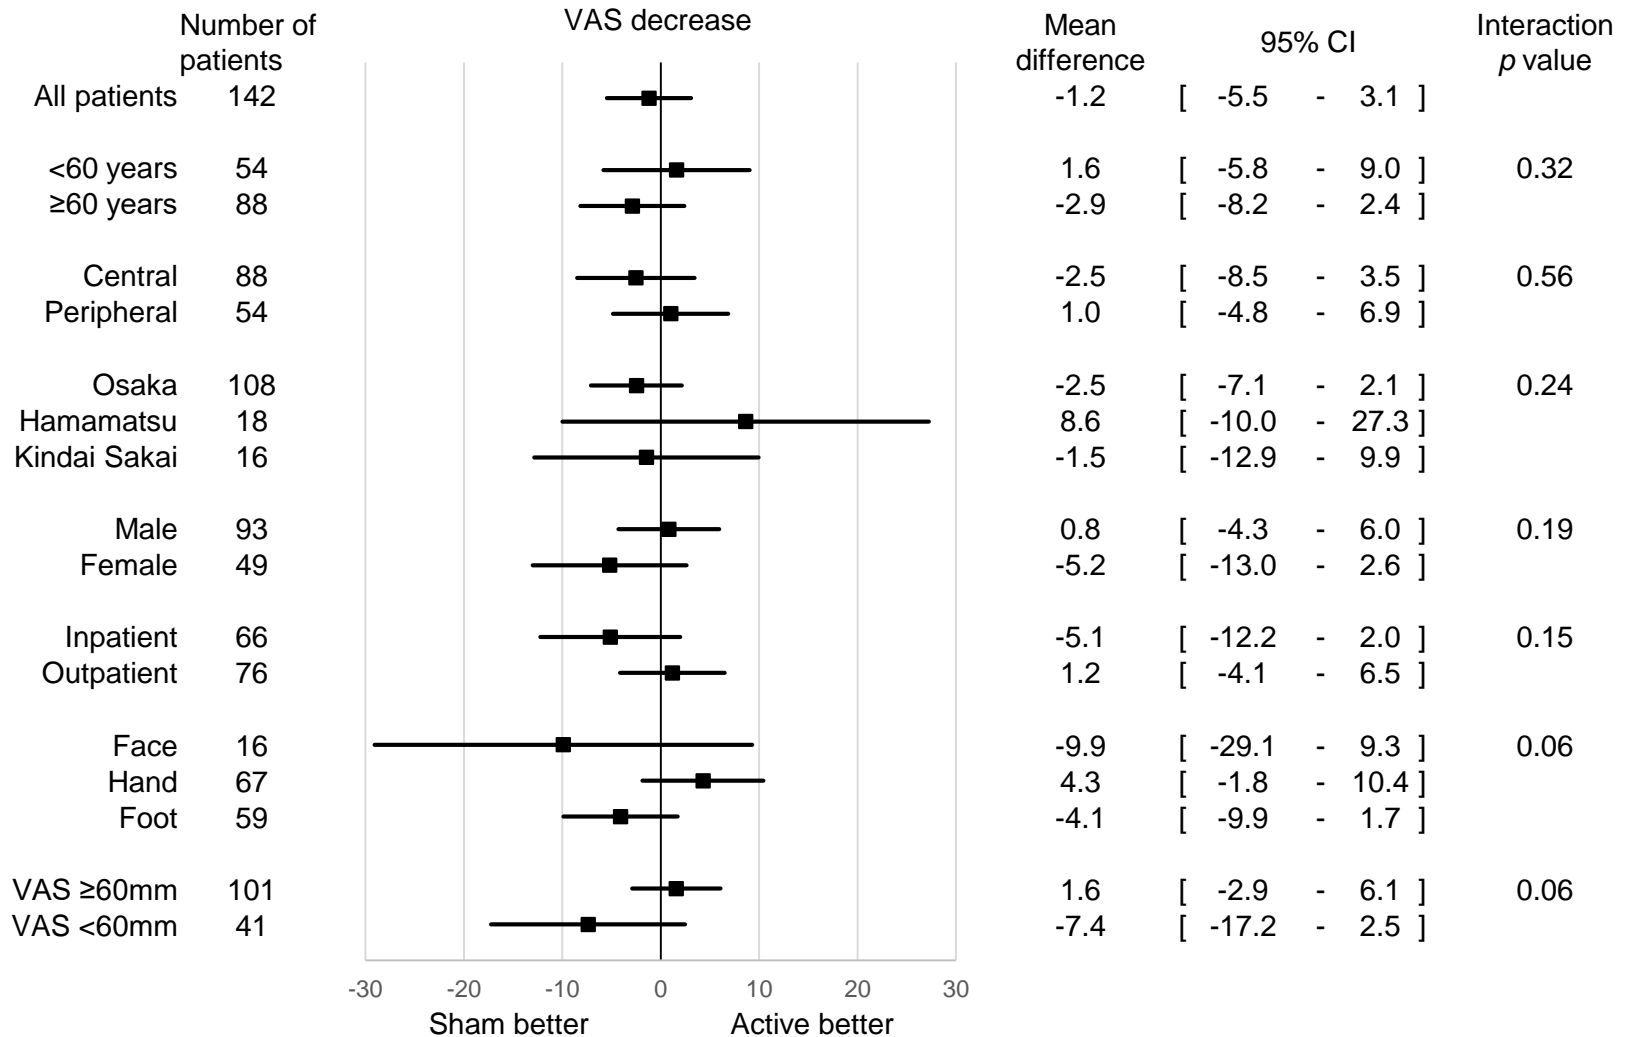

Subgroup analyses of decrease in visual analogue scale (VAS) were performed to evaluate the influence of background factors (age, cause of pain, trial site, inpatient vs. outpatient, location with maximum pain [i.e. stimulation location], and VAS at baseline  $\geq 60$  vs.  $< 60$  mm]) in the intention-to-treat population. Analyses of maximum pain and VAS at baseline were performed as post-hoc analyses.

Abbreviations: Osaka, Osaka University Hospital; Hamamatsu, Hamamatsu University Hospital; Kindai Sakai, Kindai University Sakai Hospital.
