# Supplementary material for: A randomized controlled trial of 5 daily sessions and continuous trial of 4 weekly sessions of repetitive transcranial magnetic stimulation for neuropathic pain
Source: PubMed Central journal article supplement — Pain. 2019 Oct 7;161(2):351–60. doi: 10.1097/j.pain.0000000000001712 (PMC6970577; doi:10.1097/j.pain.0000000000001712), 2019-10-07
Supplement: jop-161-351-s007.pdf [file jop-161-351-s007.pdf]

## Supplementary Figure 2B. Subgroup analyses of SF-MPQ2 decrease during the evaluation period

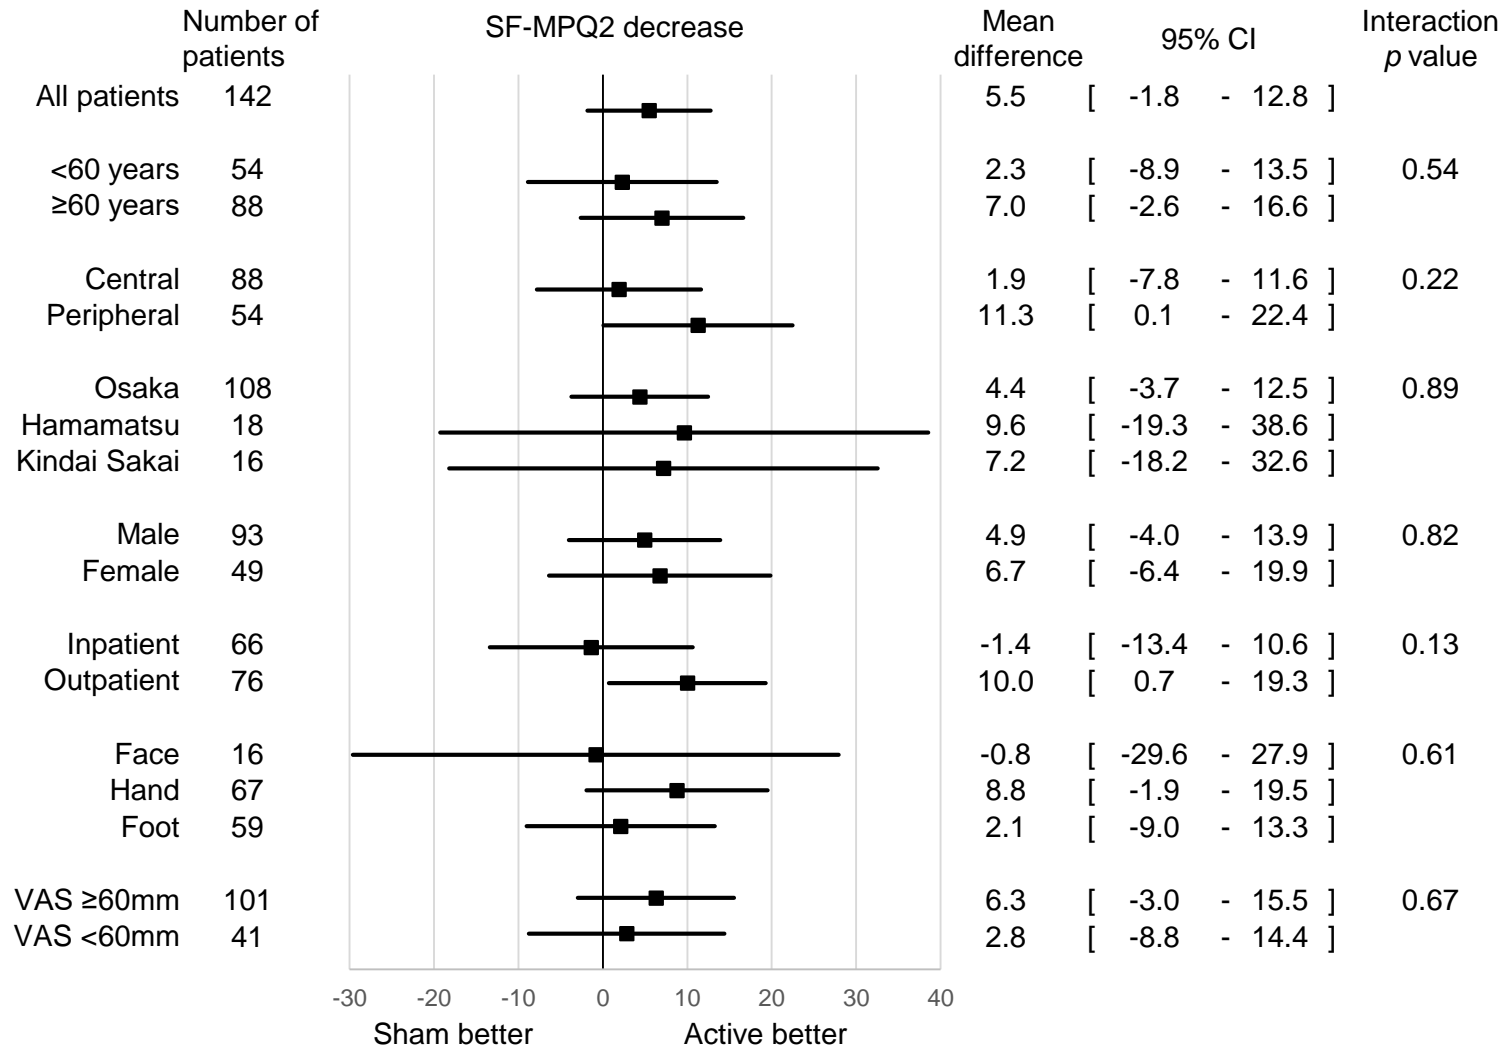

Subgroup analyses of decrease in short-form McGill pain questionnaire 2 (SF-MPQ2) were performed to evaluate the influence of background factors (age, cause of pain, trial site, inpatient vs. outpatient, location with maximum pain [i.e. stimulation location], and VAS at baseline [≥60 vs. <60 mm]) in the intention-to-treat population. Subgroup analyses of SF-MPQ2 decrease were performed as post-hoc analyses.

Abbreviations: Osaka, Osaka University Hospital; Hamamatsu, Hamamatsu University Hospital; Kindai Sakai, Kindai University Sakai Hospital.
